# Supplementary material
Source: Elsevier journal article supplement (https://www.sciencedirect.com/science/article/pii/S2173580820300808)
Supplement: mmc1 [file S2173580820300808:mmc1.pdf]

## MATERIAL SUPLEMENTARIO 1.

### TABLA SUPPL-1. CUESTIONARIO

*CUESTIONARIO: ¿Va a cambiar la neurología tras la pandemia de Covid-19 en los próximos cinco años?. Estudio de enfoque mediante informadores clave.*

Informador Clave (iniciales de nombre y apellidos) \_\_\_\_\_

Fecha del cumplimentación de la encuesta \_\_\_\_\_

Intrucciones para la cumplimentación de la encuesta. Muchas gracias por participar en este proyecto. Por favor, cumplimente la encuesta en 24 horas maximo a su recepción. A parte de las valoraciones a las cuestiones, son importantes los comentarios que como informador clave quieras realizar que se incluyan en la discusión del artículo, salvo que sean contradictorios. Las menciones particulares no aparecerán personalizadas en el artículo sino que forman parte del bagaje común de todos los autores. La cumplimentación de la encuesta supone la aceptación a participar en la publicación como autor, cuyo borrador se te remitirá para tu revisión debiendo contestar en 24 horas.

#### 1. Bloque general: La imagen del especialista de neurología y las consecuencias sobre ella por la pandemia.

| <i>Valora de 1 a 5 segun tu opinión, siendo 1 que no estás nada de acuerdo y 5 que estas totalmente de acuerdo con el enunciado marcando una cruz en la casilla correspondiente.</i> |                          |                          |                          |                          |                          |
|--------------------------------------------------------------------------------------------------------------------------------------------------------------------------------------|--------------------------|--------------------------|--------------------------|--------------------------|--------------------------|
|                                                                                                                                                                                      | 1                        | 2                        | 3                        | 4                        | 5                        |
| Neurologo cambiar por especialistas de neurologia                                                                                                                                    |                          |                          |                          |                          |                          |
| Considero que la función del especialista de neurología en general en los hospitales va a cambiar tras la pandemia                                                                   | <input type="checkbox"/> |
| Considero que para el ciudadano las enfermedades neurológicas van a aparecer como menos relevante ante el impacto de la infección                                                    | <input type="checkbox"/> |
| Considero que la pandemia va a aumentar el papel de especialidades que han intervenido directamente en ella frente al papel de los otros especialistas                               | <input type="checkbox"/> |
| Considero que la pandemia va a aumentar la fuerza de los especialidades mas implicadas en la pandemia ante la administración.                                                        | <input type="checkbox"/> |
| Considero que en general los especialistas de neurologia tendremos más dificultades en la realización de nuestra asistencia que antes de la pandemia                                 | <input type="checkbox"/> |
| Considero que la pandemia va a modificar la elección de especialidades MIR, priorizando a aquellas especialidades mas implicadas en la pandemia                                      | <input type="checkbox"/> |

|                                                                                                                                                                                                                                                                                                                                                                                                      |                          |                          |                          |                          |                          |
|------------------------------------------------------------------------------------------------------------------------------------------------------------------------------------------------------------------------------------------------------------------------------------------------------------------------------------------------------------------------------------------------------|--------------------------|--------------------------|--------------------------|--------------------------|--------------------------|
| Considero que el hecho que muchos especialistas de neurologia y MIR de neurologia han estado en areas Covid, es una demostracion práctica que el plan formativo de neurologia es suficiente para poder realizar actividades generales como ha ocurrido, en contra de aquellos que consideraban que se precisaba una formacion general mas larga durante el periodo MIR de formacion de especialistas | <input type="checkbox"/> |
| Considero que la pandemia tendrá consecuencias neurológicas a largo plazo que deban tomarse en consideracion                                                                                                                                                                                                                                                                                         | <input type="checkbox"/> |
| Considero que la pandemia supondrá un peor pronostico de enfermedades neurológicas a largo plazo que deban tomarse en consideracion                                                                                                                                                                                                                                                                  | <input type="checkbox"/> |
| Considero que la constatacion de contagio a traves de serologia deberá incorporarse como una determinación de rutina, como en su dia lo fue la serologia luetica, a partir de ahora                                                                                                                                                                                                                  | <input type="checkbox"/> |
| Considero que los servicios de neurologia deberán tener una especialistas expertos en enfermedades infecciosas.                                                                                                                                                                                                                                                                                      | <input type="checkbox"/> |
| <i>¿Deseas realizar algun comentario complementario que pueda incluirse en la discusion del articulo?</i>                                                                                                                                                                                                                                                                                            |                          |                          |                          |                          |                          |
|                                                                                                                                                                                                                                                                                                                                                                                                      |                          |                          |                          |                          |                          |

## 2. Bloque sobre la actividad asistencial y práctica clinica del neurólogo.

|                                                                                                                                                                                      |                          |                          |                          |                          |                          |
|--------------------------------------------------------------------------------------------------------------------------------------------------------------------------------------|--------------------------|--------------------------|--------------------------|--------------------------|--------------------------|
| <i>Valora de 1 a 5 segun tu opinion, siendo 1 que no estás nada de acuerdo y 5 que estas totalmente de acuerdo con el enunciado marcando una cruz en la casilla correspondiente.</i> |                          |                          |                          |                          |                          |
|                                                                                                                                                                                      | 1                        | 2                        | 3                        | 4                        | 5                        |
| Consideras que la actividad asistencial del especialista de neurología será distinta tras la epidemia                                                                                | <input type="checkbox"/> |
| Consideras que se reducirá el tiempo para la exploracion neurológica                                                                                                                 | <input type="checkbox"/> |
| Consideras que la exploracion clinica se sistematizará evitando búsqueda de datos confirmatorios                                                                                     | <input type="checkbox"/> |
| Consideras que la práctica de la exploracion del fondo con olfascopio convencional de ojo se reducirá                                                                                | <input type="checkbox"/> |
| Consideras que la exploracion del reflejo nauseoso se reducirá                                                                                                                       | <input type="checkbox"/> |
| Consideras que se restringirá el acceso de familiares a las consultas                                                                                                                | <input type="checkbox"/> |
| Consideras que se potenciarán las consultas telefonicas                                                                                                                              | <input type="checkbox"/> |

|                                                                                                     |                          |                          |                          |                          |                          |
|-----------------------------------------------------------------------------------------------------|--------------------------|--------------------------|--------------------------|--------------------------|--------------------------|
| o través de metodos electronicos                                                                    |                          |                          |                          |                          |                          |
| Consideras que se reducirán las punciones lumbares                                                  | <input type="checkbox"/> |
| Consideras que se eliminará el apretón de manos en el saludo en las consultas.                      | <input type="checkbox"/> |
| Consideras que se eliminarán las pases de visitas clinicas numerosas en la hospitalización          | <input type="checkbox"/> |
| Consideras que la pase de visita conjunta con enfermeria se reducirá en la hospitalizacion          | <input type="checkbox"/> |
| Consideras que se modificarán las salas de espera de las consultas evitando el acumulo de pacientes | <input type="checkbox"/> |
| Consideras que aumentará los tiempos entre consultas para evitar el acumulo de pacientes.           | <input type="checkbox"/> |
| ¿Deseas realizar algun comentario complementario que pueda incluirse en la discusión del articulo?. |                          |                          |                          |                          |                          |
|                                                                                                     |                          |                          |                          |                          |                          |

### 3. Bloque sobre la realización de pruebas complementarias

|                                                                                                                                                                                      |                          |                          |                          |                          |                          |
|--------------------------------------------------------------------------------------------------------------------------------------------------------------------------------------|--------------------------|--------------------------|--------------------------|--------------------------|--------------------------|
| <i>Valora de 1 a 5 segun tu opinión, siendo 1 que no estás nada de acuerdo y 5 que estas totalmente de acuerdo con el enunciado marcando una cruz en la casilla correspondiente.</i> |                          |                          |                          |                          |                          |
|                                                                                                                                                                                      | 1                        | 2                        | 3                        | 4                        | 5                        |
| Consideras que la indicacion de pruebas diagnosticas se modificará tras la pandemia                                                                                                  | <input type="checkbox"/> |
| Consideras que disminuirá la indicacion de tomografia computerizada                                                                                                                  | <input type="checkbox"/> |
| Consideras que aumentará la indicacion de tomografia computerizada                                                                                                                   | <input type="checkbox"/> |
| Consideras que disminuirá la indicacion de PET                                                                                                                                       | <input type="checkbox"/> |
| Consideras que disminuirá la indicacion de exploraciones cognitivas                                                                                                                  | <input type="checkbox"/> |
| Consideras que disminuirá la indicacion de ecografias                                                                                                                                | <input type="checkbox"/> |
| Consideras que disminuirá la indicacion de ultrasonografia de circulacion ceerebral                                                                                                  | <input type="checkbox"/> |
| Consideras que disminuirá la exploracion de urodinamica                                                                                                                              | <input type="checkbox"/> |
| Consideras que disminuirá la indicacion de estudios neurooftalmologicos                                                                                                              | <input type="checkbox"/> |

|                                                                                                                                                        |                          |                          |                          |                          |                          |
|--------------------------------------------------------------------------------------------------------------------------------------------------------|--------------------------|--------------------------|--------------------------|--------------------------|--------------------------|
| Consideras que disminuirá la indicacion de estudios vestibulares                                                                                       | <input type="checkbox"/> |
| Consideras que disminuirá la indicacion de Electromiografia y registro de nervios perifericos                                                          | <input type="checkbox"/> |
| Consideras que disminuirá la indicacion de EEG                                                                                                         | <input type="checkbox"/> |
| Consideras que disminuirá la indicacion de potenciales evocados                                                                                        | <input type="checkbox"/> |
| Consideras que disminuirá la indicacion de resonancia magnetica                                                                                        | <input type="checkbox"/> |
| Consideras que aumentará la indicacion de resonancia magnetica                                                                                         | <input type="checkbox"/> |
| Consideras que disminuirá la indicacion de resonancia magnetica con contraste                                                                          | <input type="checkbox"/> |
| Consideras que disminuirá la indicacion de angio-resonancia magnetica                                                                                  | <input type="checkbox"/> |
| Consideras que aumentará la indicacion de angio resonancia magnetica                                                                                   | <input type="checkbox"/> |
| Consideras que se estableceran procedimientos sistematicos de proteccion a facultativos y pacientes en la realizacion de exploraciones complementarias | <input type="checkbox"/> |
| Consideras que la serologia covid se incorporará como una exploracion para todos los pacientes asistidos                                               | <input type="checkbox"/> |
| <i>¿Deseas realizar algun comentario complementario que pueda incluirse en la discusión del articulo?</i>                                              |                          |                          |                          |                          |                          |
|                                                                                                                                                        |                          |                          |                          |                          |                          |

4. Bloque sobre las precauciones a tomar por el neurólogo.

|                                                                                                                                                                                      |                          |                          |                          |                          |                          |
|--------------------------------------------------------------------------------------------------------------------------------------------------------------------------------------|--------------------------|--------------------------|--------------------------|--------------------------|--------------------------|
| <i>Valora de 1 a 5 segun tu opinión, siendo 1 que no estás nada de acuerdo y 5 que estas totalmente de acuerdo con el enunciado marcando una cruz en la casilla correspondiente.</i> |                          |                          |                          |                          |                          |
|                                                                                                                                                                                      | 1                        | 2                        | 3                        | 4                        | 5                        |
| Consideras que la forma de trabajar por el especialista de neurologia cambiará                                                                                                       | <input type="checkbox"/> |
| Consideras que se utilizará mascarilla en pacientes con fiebre de origen desconocido                                                                                                 | <input type="checkbox"/> |
| Consideras que se utilizará mascarilla en pacientes con fiebre de origen conocido                                                                                                    | <input type="checkbox"/> |
| Consideras que se obligará al lavado de manos tras cada                                                                                                                              | <input type="checkbox"/> |

|                                                                                                                                         |                          |                          |                          |                          |                          |
|-----------------------------------------------------------------------------------------------------------------------------------------|--------------------------|--------------------------|--------------------------|--------------------------|--------------------------|
| consulta                                                                                                                                |                          |                          |                          |                          |                          |
| Consideras que se reducirá el papel con forma de documentacion intrahospitalaria                                                        | <input type="checkbox"/> |
| Consideras que establecerá un modelo diferente para la realizacion de la historia clinica.                                              | <input type="checkbox"/> |
| Consideras que cambiará la indumentaria de los especialistas de neurologia en la hospitalización a un tipo de vestimenta mas protectora | <input type="checkbox"/> |
| Consideras que cambiará la indumentaria de los especialistas de neurologia en la consulta a un tipo de vestimenta mas protectora        | <input type="checkbox"/> |
| Consideras que se eliminará el apretón de manos en el saludo de contacto con los pacientes                                              | <input type="checkbox"/> |
| Consideras que la relacion entre compañeros cambiará en el hospital                                                                     | <input type="checkbox"/> |
| Consideras que cambiarán las salas para la discusion de pacientes.                                                                      | <input type="checkbox"/> |
| Consideras que se tomarán medidas para la informacion a los familiares                                                                  | <input type="checkbox"/> |
| ¿Deseas realizar algun comentario complementario que pueda incluirse en la discusion del articulo?.                                     |                          |                          |                          |                          |                          |
|                                                                                                                                         |                          |                          |                          |                          |                          |

5. Bloque sobre la organización de los servicios de neurologia.

|                                                                                                                                                                                       |                          |                          |                          |                          |                          |
|---------------------------------------------------------------------------------------------------------------------------------------------------------------------------------------|--------------------------|--------------------------|--------------------------|--------------------------|--------------------------|
| <i>Valora de 1 a 5 segun tu opinión, siendo 1 que no estás nada de acuerdo y 5 que estas totalmente de acuerdo con el enunciado marcando una cruz en la casilla correspondiente..</i> |                          |                          |                          |                          |                          |
|                                                                                                                                                                                       | 1                        | 2                        | 3                        | 4                        | 5                        |
| Consideras que la organización de los servicios de neurologia cambiará                                                                                                                | <input type="checkbox"/> |
| Consideras que los servicios de neurologia tendrán un responsable para velar por las precauciones sobre los facultativos                                                              | <input type="checkbox"/> |
| Consideras que la organización de las guardias de neurologia cambiarán                                                                                                                | <input type="checkbox"/> |
| Consideras que en las guardias de neurologia se reducirán las reevaluaciones repetidas                                                                                                | <input type="checkbox"/> |
| Consideras que la organización de las consultas va a cambiar                                                                                                                          | <input type="checkbox"/> |
| Consideras que tras la pandemia va a modificar la                                                                                                                                     | <input type="checkbox"/> |

|                                                                                                                                             |                          |                          |                          |                          |                          |
|---------------------------------------------------------------------------------------------------------------------------------------------|--------------------------|--------------------------|--------------------------|--------------------------|--------------------------|
| demanda de consultas de neurologia                                                                                                          |                          |                          |                          |                          |                          |
| Consideras que las sobrecitaciones como metodo de disminuir la demora desaparecerá                                                          | <input type="checkbox"/> |
| Consideras que los servicios de neurologia tendran recursos destinados a la atencion por telemedicina                                       | <input type="checkbox"/> |
| Consideras que los pacientes que han sido covid+ tendran consultas especificas                                                              | <input type="checkbox"/> |
| Consideras que los pacientes que han sido covid+ tendran areas hospitalarias especificas                                                    | <input type="checkbox"/> |
| Consideras que los servicios de neurologia tendrán neurologos con mayor dedicacion a enf infecciosas                                        | <input type="checkbox"/> |
| Consideras que los servicios de neurologia deberán incorporar a sus vias clinicas, criterios dependiente si los pacientes han sido covid+   | <input type="checkbox"/> |
| Consideras que los servicios de neurologia potenciarán su relacion directa con los sistemas de emergencias                                  | <input type="checkbox"/> |
| Consideras que los servicios de neurologia estarán preparados a una oleada de enfermedades neurologicas tras la pandemia si se presentaran. | <input type="checkbox"/> |
| ¿Deseas realizar algun comentario complementario que pueda incluirse en la discusión del articulo?                                          |                          |                          |                          |                          |                          |
|                                                                                                                                             |                          |                          |                          |                          |                          |

6. Bloque sobre los nuevos recursos que debe disponer los servicios de neurologia.

|                                                                                                                                                                                      |                          |                          |                          |                          |                          |
|--------------------------------------------------------------------------------------------------------------------------------------------------------------------------------------|--------------------------|--------------------------|--------------------------|--------------------------|--------------------------|
| <i>Valora de 1 a 5 segun tu opinión, siendo 1 que no estás nada de acuerdo y 5 que estas totalmente de acuerdo con el enunciado marcando una cruz en la casilla correspondiente.</i> |                          |                          |                          |                          |                          |
|                                                                                                                                                                                      | 1                        | 2                        | 3                        | 4                        | 5                        |
| Consideras que la pandemia conllevará que los servicios de Neurologia dispondrán de recursos adicionales                                                                             | <input type="checkbox"/> |
| Consideras que la pandemia conllevará debido al consumo de recursos por la misma que los servicios de Neurologia dispondrá de una disminucion de recursos adicionales                | <input type="checkbox"/> |
| Consideras que se dispondrán de equipos instrumentales con pantalla para valorar el fondo de ojo                                                                                     | <input type="checkbox"/> |
| Consideras que se dispondrán de equipos de EMG que reduzcan el tiempo de exposicion                                                                                                  | <input type="checkbox"/> |
| Consideras que se dispondrán de equipos de ultrasonografia de vasos cerebrales que no precisen la                                                                                    | <input type="checkbox"/> |

|                                                                                                                                |                          |                          |                          |                          |                          |
|--------------------------------------------------------------------------------------------------------------------------------|--------------------------|--------------------------|--------------------------|--------------------------|--------------------------|
| movilizacion de la sonda                                                                                                       |                          |                          |                          |                          |                          |
| Consideras que se dispondrán de equipos de telemedicina mejores y de mejor acceso                                              | <input type="checkbox"/> |
| Consideras que se dispondran de mayor difusion de lineas telefonicas y de acceso a internet                                    | <input type="checkbox"/> |
| Consideras que aumentarán los recursos en analisis de biomarcadores                                                            | <input type="checkbox"/> |
| Consideras que se impulsará de forma importante los archivos electronicos                                                      | <input type="checkbox"/> |
| Consideras que se aumentará la ratio de enfermeria en las salas de hospitalizacion de neurologia                               | <input type="checkbox"/> |
| Consideras que conllevará la contratacion de menos especialistas de neurologia en favor de contratacion de otros especialistas | <input type="checkbox"/> |
| Consideras que conllevará la contratacion de mas especialistas de neurologia                                                   | <input type="checkbox"/> |
| ¿Deseas realizar algun comentario complementario que pueda incluirse en la discusión del artículo?.                            |                          |                          |                          |                          |                          |
|                                                                                                                                |                          |                          |                          |                          |                          |

7. Bloque sobre la enfermeria neurologica y el papel de la enfermeria de enlace con los pacientes..

|                                                                                                                                                                                      |                          |                          |                          |                          |                          |
|--------------------------------------------------------------------------------------------------------------------------------------------------------------------------------------|--------------------------|--------------------------|--------------------------|--------------------------|--------------------------|
| <i>Valora de 1 a 5 segun tu opinión, siendo 1 que no estás nada de acuerdo y 5 que estas totalmente de acuerdo con el enunciado marcando una cruz en la casilla correspondiente.</i> |                          |                          |                          |                          |                          |
|                                                                                                                                                                                      | 1                        | 2                        | 3                        | 4                        | 5                        |
| Consideras que la pandemia conllevará cambios en la organización de la enfermeria neurologica                                                                                        | <input type="checkbox"/> |
| Consideras que se potenciará la figura de enfermeria de enlace con los pacientes                                                                                                     | <input type="checkbox"/> |
| Consideras que cambiará la relacion entre facultativos y enfermeria en las salas de hospitalizacion                                                                                  | <input type="checkbox"/> |
| Consideras que cambiará la relacion entre pacientes y enfermeria en las salas de hospitalizacion                                                                                     | <input type="checkbox"/> |
| Consideras que cambiará la relacion entre facultativos y enfermeria en las consultas                                                                                                 | <input type="checkbox"/> |
| Consideras que cambiará la relacion entre pacientes y enfermeria en las consultas                                                                                                    | <input type="checkbox"/> |
| Consideras que habrá protocolos de manejo de la documentacion en papel en la hospitalizacion                                                                                         | <input type="checkbox"/> |

|                                                                                                                                                   |                          |                          |                          |                          |                          |
|---------------------------------------------------------------------------------------------------------------------------------------------------|--------------------------|--------------------------|--------------------------|--------------------------|--------------------------|
| Consideras que habrá protocolos de manejo de la documentacion en papel en las consultas                                                           | <input type="checkbox"/> |
| Consideras que la supervision de enfermeria debe monitorizar la actuacion de los servicios de limpieza en las salas de hospitalizacion            | <input type="checkbox"/> |
| Consideras que la supervision de enfermeria debe monitorizar la actuacion de los servicios de limpieza en las consultas                           | <input type="checkbox"/> |
| Consideras que jefes de servicio y supervision de enfermeria debe monitorizar la actuacion de los servicios de limpieza en los despachos clinicos | <input type="checkbox"/> |
| Consideras que la relacion entre facultativos y enfermeria cambiará                                                                               | <input type="checkbox"/> |
| ¿Deseas realizar algun comentario complementario que pueda incluirse en la discusión del artículo?                                                |                          |                          |                          |                          |                          |
|                                                                                                                                                   |                          |                          |                          |                          |                          |

#### 8. Bloque sobre la atencion al Ictus.

|                                                                                                                                                                                      |                          |                          |                          |                          |                          |
|--------------------------------------------------------------------------------------------------------------------------------------------------------------------------------------|--------------------------|--------------------------|--------------------------|--------------------------|--------------------------|
| <i>Valora de 1 a 5 segun tu opinión, siendo 1 que no estás nada de acuerdo y 5 que estas totalmente de acuerdo con el enunciado marcando una cruz en la casilla correspondiente.</i> |                          |                          |                          |                          |                          |
|                                                                                                                                                                                      | 1                        | 2                        | 3                        | 4                        | 5                        |
| Consideras que la atención al ictus cambiará debido a la pandemia                                                                                                                    | <input type="checkbox"/> |
| Consideras que los planes de ictus incorporarán como variable la determinacion de covid+ como un dato a recoger por las urgencias en la aplicación de codigo ictus                   | <input type="checkbox"/> |
| Debido al riesgo de infeccion, consideras que los codigos ictus modificarán el criterio de edad                                                                                      | <input type="checkbox"/> |
| Consideras que las unidades de ictus tendrán salas covid+ y covid-                                                                                                                   | <input type="checkbox"/> |
| Consideras que si hubiera salas de ictus covid+ seguiran en el servicio de neurologia                                                                                                | <input type="checkbox"/> |
| Consideras que en los pacientes covid+ se modificará las vias clinicas de atencion diagnostica                                                                                       | <input type="checkbox"/> |
| Consideras que en los pacientes covid+ se modificará las vias clinicas de atencion terapeutica                                                                                       | <input type="checkbox"/> |
| Consideras que en los pacientes covid+ se modificará los criterios de neurointervencion                                                                                              | <input type="checkbox"/> |
| Consideras que la pandemia conllevará una menor                                                                                                                                      | <input type="checkbox"/> |



|                                                                                                    |                          |                          |                          |                          |                          |
|----------------------------------------------------------------------------------------------------|--------------------------|--------------------------|--------------------------|--------------------------|--------------------------|
| utilizacion del codigo ictus por los pacientes                                                     |                          |                          |                          |                          |                          |
| Consideras que el virus sobre llevará un aumento de incidencia de ictus a medio plazo              | <input type="checkbox"/> |
| Consideras que la pandemia supondrá un incremento en la mortalidad del ictus.                      | <input type="checkbox"/> |
| Consideras que las unidades de ictus cambiarán su organización tras la pandemia                    | <input type="checkbox"/> |
| ¿Deseas realizar algun comentario complementario que pueda incluirse en la discusión del articulo? |                          |                          |                          |                          |                          |
|                                                                                                    |                          |                          |                          |                          |                          |

9. Bloque sobre cambios en la docencia de la neurologia.

|                                                                                                                                                                                                               |                          |                          |                          |                          |                          |
|---------------------------------------------------------------------------------------------------------------------------------------------------------------------------------------------------------------|--------------------------|--------------------------|--------------------------|--------------------------|--------------------------|
| <i>Valora de 1 a 5 segun tu opinión, siendo 1 que no estás nada de acuerdo y 5 que estas totalmente de acuerdo con el enunciado marcando una cruz en la casilla correspondiente.</i>                          |                          |                          |                          |                          |                          |
|                                                                                                                                                                                                               | 1                        | 2                        | 3                        | 4                        | 5                        |
| Consideras que la pandemia modificará habitos docentes en los servicios de neurologia                                                                                                                         | <input type="checkbox"/> |
| Consideras que la estructura de sesiones clinicas presenciales se modificará                                                                                                                                  | <input type="checkbox"/> |
| Consideras que la estructura de cursos presenciales se modificará                                                                                                                                             | <input type="checkbox"/> |
| Consideras que aumentaran las sesiones virtuales                                                                                                                                                              | <input type="checkbox"/> |
| Consideras que aumentaran los cursos virtuales                                                                                                                                                                | <input type="checkbox"/> |
| Consideras que se reduciran las practicas hospitalarias con pacientes de los estudiantes.                                                                                                                     | <input type="checkbox"/> |
| Consideras que aumentarán los talleres electronicos de los estudiantes                                                                                                                                        | <input type="checkbox"/> |
| Consideras que cambiará el plan formativo de la especialidad como consecuencia de la pandemia                                                                                                                 | <input type="checkbox"/> |
| Consideras que habiendo demostrado los especialistas de neurologia y MIR de neurologia que son capaces de actuar en salas de infecciosos, no tendrá sentido aumentar los tiempos de medicina en la formacion. | <input type="checkbox"/> |
| Aunque el plan de neurologia establece la rotacion obligatoria en infecciosas y eso no se ha cumplido en algunas unidades docente, la comision nacional de                                                    | <input type="checkbox"/> |

|                                                                                                                                                                |                          |                          |                          |                          |                          |
|----------------------------------------------------------------------------------------------------------------------------------------------------------------|--------------------------|--------------------------|--------------------------|--------------------------|--------------------------|
| neurología monitorizará el cumplimiento de esta rotación en los futuros residentes                                                                             | <input type="checkbox"/> |
| Consideras que los tutores de neurología aseguran que los residentes en formación adquieran las habilidades precisas para su protección en la práctica clínica | <input type="checkbox"/> |
| Consideras que la pandemia modificará la actitud de los residentes con los pacientes.                                                                          | <input type="checkbox"/> |
| Consideras que los congresos de neurología cambiarán tras la pandemia                                                                                          | <input type="checkbox"/> |
| <i>¿Deseas realizar algun comentario complementario que pueda incluirse en la discusión del artículo?.</i>                                                     |                          |                          |                          |                          |                          |
|                                                                                                                                                                |                          |                          |                          |                          |                          |

10. Bloque cambios sobre la investigación neurológica.

|                                                                                                                                                                                      |                          |                          |                          |                          |                          |
|--------------------------------------------------------------------------------------------------------------------------------------------------------------------------------------|--------------------------|--------------------------|--------------------------|--------------------------|--------------------------|
| <i>Valora de 1 a 5 según tu opinión, siendo 1 que no estás nada de acuerdo y 5 que estás totalmente de acuerdo con el enunciado marcando una cruz en la casilla correspondiente.</i> |                          |                          |                          |                          |                          |
|                                                                                                                                                                                      | 1                        | 2                        | 3                        | 4                        | 5                        |
| Consideras que la pandemia modificará la investigación en los ensayos clínicos                                                                                                       | <input type="checkbox"/> |
| Consideras que disminuirán los ensayos clínicos en neurología                                                                                                                        | <input type="checkbox"/> |
| Consideras que se implantará un protocolo de actuación de los monitores en cuanto al manejo de las historias                                                                         | <input type="checkbox"/> |
| Consideras que se implantará un protocolo de actuación de los monitores en cuanto al acceso al hospital y a las sala donde se realiza la monitorización                              | <input type="checkbox"/> |
| Consideras que habrá un protocolo de actuación sobre los contratados para ensayos clínicos                                                                                           | <input type="checkbox"/> |
| Consideras que se limitará el acceso de los contratados para ensayos clínicos a las áreas asistenciales                                                                              | <input type="checkbox"/> |
| Consideras que los pacientes reclutados para ensayos clínicos tendrán una consideración específica sobre su estado covid                                                             | <input type="checkbox"/> |
| Consideras que en los requisitos éticos de la investigación debe ser anónima los antecedentes de contagio a covid                                                                    | <input type="checkbox"/> |
| Consideras que los servicios de neurología implantarán líneas de investigación sobre la repercusión de Covid en el sistema nervioso                                                  | <input type="checkbox"/> |

|                                                                                                                                                              |                          |                          |                          |                          |                          |
|--------------------------------------------------------------------------------------------------------------------------------------------------------------|--------------------------|--------------------------|--------------------------|--------------------------|--------------------------|
| Consideras que teniendo en cuenta el alto numero de pacientes contagiados, se establecerán bases de datos específicas de las alteraciones neurologicas       | <input type="checkbox"/> |
| Consideras que la pandemia conllevará mayor numero de recursos a la investigacion en neurologia                                                              | <input type="checkbox"/> |
| Consideras que Covid generará un mayor interes por la investigacion en los neurologos.                                                                       | <input type="checkbox"/> |
| Consideras que ha sido correcta que Neurologia, como otra revistas cientificas, ha establecido un metodo de publicacion rapida a los articulos sobre Covid19 | <input type="checkbox"/> |
| ¿Deseas realizar algun comentario complementario que pueda incluirse en la discusión del articulo.?                                                          |                          |                          |                          |                          |                          |
|                                                                                                                                                              |                          |                          |                          |                          |                          |

¿Hay algún comentario o sugerencia adicional? ☐ Si ☐ No. Si la respuesta es Si, describelo: \_\_\_\_\_

Muchas gracias por participar este proyecto.
