# Supplementary material
Source: Elsevier journal article supplement (https://www.sciencedirect.com/science/article/pii/S2173580820300808)
Supplement: mmc2 [file S2173580820300808:mmc2.pdf]

MATERIAL SUPLEMENTARIO 2.TABLA SUPPL-2. CONSENSOS SOBRE LOS DISTINTOS ENUNCIADOS.1. La imagen del especialista de neurología y las consecuencias sobre ella por la pandemia.

| <i>Consenso 85% (mayor); Consenso 71% (menor); NC ausencia de consenso</i> |                                                                                                                                                                                                                                                                                                                                                                                                      |                          |                          |                          |                          |                          |
|----------------------------------------------------------------------------|------------------------------------------------------------------------------------------------------------------------------------------------------------------------------------------------------------------------------------------------------------------------------------------------------------------------------------------------------------------------------------------------------|--------------------------|--------------------------|--------------------------|--------------------------|--------------------------|
|                                                                            | Enunciado                                                                                                                                                                                                                                                                                                                                                                                            | C85%+                    | C85%-                    | C71%+                    | C71%-                    | NC                       |
| A1                                                                         | Considero que la función del especialista de neurología en general en los hospitales va a cambiar tras la pandemia                                                                                                                                                                                                                                                                                   | <input type="checkbox"/> | <input type="checkbox"/> | <input type="checkbox"/> | <input type="checkbox"/> | NC                       |
| A2                                                                         | Considero que para el ciudadano las enfermedades neurológicas van a aparecer como menos relevante ante el impacto de la infección                                                                                                                                                                                                                                                                    | <input type="checkbox"/> | <input type="checkbox"/> | <input type="checkbox"/> | C71%-                    | <input type="checkbox"/> |
| A3                                                                         | Considero que la pandemia va a aumentar el papel de especialidades que han intervenido directamente en ella frente al papel de los otros especialistas                                                                                                                                                                                                                                               | <input type="checkbox"/> | <input type="checkbox"/> | <input type="checkbox"/> | <input type="checkbox"/> | NC                       |
| A4                                                                         | Considero que la pandemia va a aumentar la fuerza de los especialidades mas implicadas en la pandemia ante la administración.                                                                                                                                                                                                                                                                        | <input type="checkbox"/> | <input type="checkbox"/> | C71%+                    | <input type="checkbox"/> | <input type="checkbox"/> |
| A5                                                                         | Considero que en general los especialistas de neurologia tendremos más dificultades en la realización de nuestra asistencia que antes de la pandemia                                                                                                                                                                                                                                                 | <input type="checkbox"/> | <input type="checkbox"/> | <input type="checkbox"/> | <input type="checkbox"/> | NC                       |
| A6                                                                         | Considero que la pandemia va a modificar la elección de especialidades MIR, priorizando a aquellas especialidades mas implicadas en la pandemia                                                                                                                                                                                                                                                      | <input type="checkbox"/> | <input type="checkbox"/> | <input type="checkbox"/> | <input type="checkbox"/> | NC                       |
| A7                                                                         | Considero que el hecho que muchos especialistas de neurologia y MIR de neurologia han estado en areas Covid, es una demostracion práctica que el plan formativo de neurologia es suficiente para poder realizar actividades generales como ha ocurrido, en contra de aquellos que consideraban que se precisaba una formacion general mas larga durante el periodo MIR de formacion de especialistas | <input type="checkbox"/> | <input type="checkbox"/> | C71%+                    | <input type="checkbox"/> | <input type="checkbox"/> |
| A8                                                                         | Considero que la pandemia tendrá consecuencias neurológicas a largo plazo que deban tomarse en consideracion                                                                                                                                                                                                                                                                                         | <input type="checkbox"/> | <input type="checkbox"/> | C71%+                    | <input type="checkbox"/> | <input type="checkbox"/> |
| A9                                                                         | Considero que la pandemia supondrá un peor pronostico de enfermedades neurológicas a largo plazo que deban tomarse en consideracion                                                                                                                                                                                                                                                                  | <input type="checkbox"/> | <input type="checkbox"/> | <input type="checkbox"/> | <input type="checkbox"/> | NC                       |
| A10                                                                        | Considero que la constatacion de contagio a traves de serologia deberá incorporarse como una determinación de rutina, como en su día lo fue la serologia luetica, a partir de ahora                                                                                                                                                                                                                  | <input type="checkbox"/> | <input type="checkbox"/> | C71%+                    | <input type="checkbox"/> | <input type="checkbox"/> |

|     |                                                                                                                 |                          |                          |                          |                          |    |
|-----|-----------------------------------------------------------------------------------------------------------------|--------------------------|--------------------------|--------------------------|--------------------------|----|
| A11 | Considero que los servicios de neurologia deberán tener una especialistas expertos en enfermedades infecciosas. | <input type="checkbox"/> | <input type="checkbox"/> | <input type="checkbox"/> | <input type="checkbox"/> | NC |
|-----|-----------------------------------------------------------------------------------------------------------------|--------------------------|--------------------------|--------------------------|--------------------------|----|

## 2. Bloque sobre la actividad asistencial y práctica clínica del neurólogo.

| <i>Consenso 85% (mayor); Consenso 71% (menor); NC ausencia de consenso</i> |                                                                                                       |                          |                          |                          |                          |                          |
|----------------------------------------------------------------------------|-------------------------------------------------------------------------------------------------------|--------------------------|--------------------------|--------------------------|--------------------------|--------------------------|
|                                                                            | Enunciado                                                                                             | C85%+                    | C85%-                    | C71%+                    | C71%-                    | NC                       |
| B1                                                                         | Consideras que la actividad asistencial del especialista de neurología será distinta tras la epidemia | <input type="checkbox"/> | <input type="checkbox"/> | <input type="checkbox"/> | <input type="checkbox"/> | NC                       |
| B2                                                                         | Consideras que se reducirá el tiempo para la exploracion neurológica                                  | <input type="checkbox"/> | <input type="checkbox"/> | <input type="checkbox"/> | <input type="checkbox"/> | NC                       |
| B3                                                                         | Consideras que la exploracion clinica se sistematizará evitando búsqueda de datos confirmatorios      | <input type="checkbox"/> | <input type="checkbox"/> | <input type="checkbox"/> | <input type="checkbox"/> | NC                       |
| B4                                                                         | Consideras que la práctica de la exploracion del fondo con olfascopio convencional de ojo se reducirá | <input type="checkbox"/> | <input type="checkbox"/> | <input type="checkbox"/> | <input type="checkbox"/> | NC                       |
| B5                                                                         | Consideras que la exploracion del reflejo nauseoso se reducirá                                        | <input type="checkbox"/> | <input type="checkbox"/> | <input type="checkbox"/> | <input type="checkbox"/> | NC                       |
| B6                                                                         | Consideras que se restringirá el acceso de familiares a las consultas                                 | <input type="checkbox"/> | <input type="checkbox"/> | <input type="checkbox"/> | <input type="checkbox"/> | NC                       |
| B7                                                                         | Consideras que se potenciarán las consultas telefonicas o través de metodos electronicos              | <input type="checkbox"/> | <input type="checkbox"/> | C71%+                    | <input type="checkbox"/> | <input type="checkbox"/> |
| B8                                                                         | Consideras que se reducirán las punciones lumbares                                                    | <input type="checkbox"/> | C85%-                    | <input type="checkbox"/> | <input type="checkbox"/> | <input type="checkbox"/> |
| B9                                                                         | Consideras que se eliminará el apretón de manos en el saludo en las consultas.                        | <input type="checkbox"/> | <input type="checkbox"/> | C71%+                    | <input type="checkbox"/> | <input type="checkbox"/> |
| B10                                                                        | Consideras que se eliminarán las pases de visitas clinicas numerosas en la hospitalización            | <input type="checkbox"/> | <input type="checkbox"/> | C71%+                    | <input type="checkbox"/> | <input type="checkbox"/> |
| B11                                                                        | Consideras que la pase de visita conjunta con enfermeria se reducirá en la hospitalizacion            | <input type="checkbox"/> | <input type="checkbox"/> | <input type="checkbox"/> | <input type="checkbox"/> | NC                       |
| B12                                                                        | Consideras que se modificarán las salas de espera de las consultas evitando el acumulo de pacientes   | C85%+                    | <input type="checkbox"/> | <input type="checkbox"/> | <input type="checkbox"/> | <input type="checkbox"/> |
| B13                                                                        | Consideras que aumentará los tiempos entre consultas para evitar el acumulo de pacientes.             | <input type="checkbox"/> | <input type="checkbox"/> | C71%+                    | <input type="checkbox"/> | <input type="checkbox"/> |

## 3. Bloque sobre la realización de pruebas complementarias

| <i>Consenso 85% (mayor); Consenso 71% (menor); NC ausencia de consenso</i> |                                         |                          |                          |                          |                          |    |
|----------------------------------------------------------------------------|-----------------------------------------|--------------------------|--------------------------|--------------------------|--------------------------|----|
|                                                                            | Enunciado                               | C85%+                    | C85%-                    | C71%+                    | C71%-                    | NC |
| C1                                                                         | Consideras que la indicacion de pruebas | <input type="checkbox"/> | <input type="checkbox"/> | <input type="checkbox"/> | <input type="checkbox"/> | NC |

|     |                                                                                                                                                        |                          |                          |                          |                          |                          |
|-----|--------------------------------------------------------------------------------------------------------------------------------------------------------|--------------------------|--------------------------|--------------------------|--------------------------|--------------------------|
|     | diagnosticas se modificará tras la pandemia                                                                                                            |                          |                          |                          |                          |                          |
| C2  | Consideras que disminuirá la indicacion de tomografia computerizada                                                                                    | <input type="checkbox"/> | C85%-                    | <input type="checkbox"/> | <input type="checkbox"/> | <input type="checkbox"/> |
| C3  | Consideras que aumentará la indicacion de tomografia computerizada                                                                                     | <input type="checkbox"/> | <input type="checkbox"/> | <input type="checkbox"/> | <input type="checkbox"/> | NC                       |
| C4  | Consideras que disminuirá la indicacion de PET                                                                                                         | <input type="checkbox"/> | <input type="checkbox"/> | <input type="checkbox"/> | C71%-                    | <input type="checkbox"/> |
| C5  | Consideras que disminuirá la indicacion de exploraciones cognitivas                                                                                    | <input type="checkbox"/> | <input type="checkbox"/> | <input type="checkbox"/> | <input type="checkbox"/> | NC                       |
| C6  | Consideras que disminuirá la indicacion de ecografias                                                                                                  | <input type="checkbox"/> | <input type="checkbox"/> | <input type="checkbox"/> | <input type="checkbox"/> | NC                       |
| C7  | Consideras que disminuirá la indicacion de ultrasonografia de circulacion ceerebral                                                                    | <input type="checkbox"/> | <input type="checkbox"/> | <input type="checkbox"/> | C71%-                    | <input type="checkbox"/> |
| C8  | Consideras que disminuirá la exploracion de urodinamica                                                                                                | <input type="checkbox"/> | <input type="checkbox"/> | <input type="checkbox"/> | <input type="checkbox"/> | NC                       |
| C9  | Consideras que disminuirá la indicacion de estudios neurooftalmologicos                                                                                | <input type="checkbox"/> | <input type="checkbox"/> | <input type="checkbox"/> | C71%-                    | <input type="checkbox"/> |
| C10 | Consideras que disminuirá la indicacion de estudios vestibulares                                                                                       | <input type="checkbox"/> | <input type="checkbox"/> | <input type="checkbox"/> | C71%-                    | <input type="checkbox"/> |
| C11 | Consideras que disminuirá la indicacion de Electromiografia y registro de nervios perifericos                                                          | <input type="checkbox"/> | C85%-                    | <input type="checkbox"/> | <input type="checkbox"/> | <input type="checkbox"/> |
| C12 | Consideras que disminuirá la indicacion de EEG                                                                                                         | <input type="checkbox"/> | C85%-                    | <input type="checkbox"/> | <input type="checkbox"/> | <input type="checkbox"/> |
| C13 | Consideras que disminuirá la indicacion de potenciales evocados                                                                                        | <input type="checkbox"/> | <input type="checkbox"/> | <input type="checkbox"/> | C71%-                    | <input type="checkbox"/> |
| C14 | Consideras que disminuirá la indicacion de resonancia magnetica                                                                                        | <input type="checkbox"/> | C85%-                    | <input type="checkbox"/> | <input type="checkbox"/> | <input type="checkbox"/> |
| C15 | Consideras que aumentará la indicacion de resonancia magnetica                                                                                         | <input type="checkbox"/> | <input type="checkbox"/> | <input type="checkbox"/> | <input type="checkbox"/> | NC                       |
| C16 | Consideras que disminuirá la indicacion de resonancia magnetica con contraste                                                                          | <input type="checkbox"/> | <input type="checkbox"/> | <input type="checkbox"/> | C71%-                    | <input type="checkbox"/> |
| C17 | Consideras que disminuirá la indicacion de angio-resonancia magnetica                                                                                  | <input type="checkbox"/> | <input type="checkbox"/> | <input type="checkbox"/> | C71%-                    | <input type="checkbox"/> |
| C18 | Consideras que aumentará la indicacion de angio resonancia magnetica                                                                                   | <input type="checkbox"/> | <input type="checkbox"/> | <input type="checkbox"/> | <input type="checkbox"/> | NC                       |
| C19 | Consideras que se estableceran procedimientos sistematicos de proteccion a facultativos y pacientes en la realizacion de exploraciones complementarias | <input type="checkbox"/> | <input type="checkbox"/> | C71%+                    | <input type="checkbox"/> | <input type="checkbox"/> |
| C20 | Consideras que la serologia covid se incorporará como una exploracion para todos los pacientes asistidos                                               | <input type="checkbox"/> | <input type="checkbox"/> | <input type="checkbox"/> | <input type="checkbox"/> | NC                       |

4. Bloque sobre las precauciones a tomar por el especialista de neurologia.

|     | <i>Consenso 85% (mayor); Consenso 71% (menor); NC ausencia de consenso</i>                                                              |                          |                          |                          |                          |                          |
|-----|-----------------------------------------------------------------------------------------------------------------------------------------|--------------------------|--------------------------|--------------------------|--------------------------|--------------------------|
|     | Enunciado                                                                                                                               | C85%+                    | C85%-                    | C71%+                    | C71%-                    | NC                       |
| D1  | Consideras que la forma de trabajar por el especialista de neurologia cambiara                                                          | C85%+                    | <input type="checkbox"/> | <input type="checkbox"/> | <input type="checkbox"/> | <input type="checkbox"/> |
| D2  | Consideras que se utilizará mascarilla en pacientes con fiebre de origen desconocido                                                    | C85%+                    | <input type="checkbox"/> | <input type="checkbox"/> | <input type="checkbox"/> | <input type="checkbox"/> |
| D3  | Consideras que se utilizará mascarilla en pacientes con fiebre de origen conocido                                                       | <input type="checkbox"/> | <input type="checkbox"/> | C71%+                    | <input type="checkbox"/> | <input type="checkbox"/> |
| D4  | Consideras que se obligará al lavado de manos tras cada consulta                                                                        | C85%+                    | <input type="checkbox"/> | <input type="checkbox"/> | <input type="checkbox"/> | <input type="checkbox"/> |
| D5  | Consideras que se reducirá el papel con forma de documentacion intrahospitalaria                                                        | <input type="checkbox"/> | <input type="checkbox"/> | C71%+                    | <input type="checkbox"/> | <input type="checkbox"/> |
| D6  | Consideras que establecerá un modelo diferente para la realizacion de la historia clinica.                                              | <input type="checkbox"/> | <input type="checkbox"/> | <input type="checkbox"/> | <input type="checkbox"/> | NC                       |
| D7  | Consideras que cambiara la indumentaria de los especialistas de neurologia en la hospitalización a un tipo de vestimenta mas protectora | <input type="checkbox"/> | <input type="checkbox"/> | <input type="checkbox"/> | <input type="checkbox"/> | NC                       |
| D8  | Consideras que cambiara la indumentaria de los especialistas de neurologia en la consulta a un tipo de vestimenta mas protectora        | <input type="checkbox"/> | <input type="checkbox"/> | <input type="checkbox"/> | <input type="checkbox"/> | NC                       |
| D9  | Consideras que se eliminará el apretón de manos en el saludo de contacto con los pacientes                                              | C85%+                    | <input type="checkbox"/> | <input type="checkbox"/> | <input type="checkbox"/> | <input type="checkbox"/> |
| D10 | Consideras que la relacion entre compañeros cambiara en el hospital                                                                     | <input type="checkbox"/> | <input type="checkbox"/> | <input type="checkbox"/> | <input type="checkbox"/> | NC                       |
| D11 | Consideras que cambiarán las salas para la discusion de pacientes.                                                                      | <input type="checkbox"/> | <input type="checkbox"/> | <input type="checkbox"/> | <input type="checkbox"/> | NC                       |
| D12 | Consideras que se tomarán medidas para la informacion a los familiares                                                                  | <input type="checkbox"/> | <input type="checkbox"/> | <input type="checkbox"/> | <input type="checkbox"/> | NC                       |

5. Bloque sobre la organización de los servicios de neurologia.

|    | <i>Consenso 85% (mayor); Consenso 71% (menor); NC ausencia de consenso</i>                                               |                          |                          |                          |                          |    |
|----|--------------------------------------------------------------------------------------------------------------------------|--------------------------|--------------------------|--------------------------|--------------------------|----|
|    | Enunciado                                                                                                                | C85%+                    | C85%-                    | C71%+                    | C71%-                    | NC |
| E1 | Consideras que la organización de los servicios de neurologia cambiara                                                   | <input type="checkbox"/> | <input type="checkbox"/> | <input type="checkbox"/> | <input type="checkbox"/> | NC |
| E2 | Consideras que los servicios de neurologia tendran un responsable para velar por las precauciones sobre los facultativos | <input type="checkbox"/> | <input type="checkbox"/> | <input type="checkbox"/> | <input type="checkbox"/> | NC |
| E3 | Consideras que la organización de las guardias de neurologia cambiarán                                                   | <input type="checkbox"/> | <input type="checkbox"/> | <input type="checkbox"/> | <input type="checkbox"/> | NC |

|     |                                                                                                                                             |                          |                          |                          |                          |                          |
|-----|---------------------------------------------------------------------------------------------------------------------------------------------|--------------------------|--------------------------|--------------------------|--------------------------|--------------------------|
|     |                                                                                                                                             |                          |                          |                          |                          |                          |
| E4  | Consideras que en las guardias de neurologia se reducirán las reevaluaciones repetidas                                                      | C85%+                    | <input type="checkbox"/> | <input type="checkbox"/> | <input type="checkbox"/> | <input type="checkbox"/> |
| E5  | Consideras que la organización de las consultas va a cambiar                                                                                | <input type="checkbox"/> | <input type="checkbox"/> | <input type="checkbox"/> | <input type="checkbox"/> | NC                       |
| E6  | Consideras que tras la pandemia va a modificar la demanda de consultas de neurologia                                                        | <input type="checkbox"/> | <input type="checkbox"/> | <input type="checkbox"/> | <input type="checkbox"/> | NC                       |
| E7  | Consideras que las sobrecitaciones como metodo de disminuir la demora desaparecerá                                                          | C85%+                    | <input type="checkbox"/> | <input type="checkbox"/> | <input type="checkbox"/> | <input type="checkbox"/> |
| E8  | Consideras que los servicios de neurologia tendran recursos destinados a la atencion por telemedicina                                       | <input type="checkbox"/> | <input type="checkbox"/> | <input type="checkbox"/> | <input type="checkbox"/> | NC                       |
| E9  | Consideras que los pacientes que han sido covid+ tendran consultas especificas                                                              | <input type="checkbox"/> | <input type="checkbox"/> | <input type="checkbox"/> | <input type="checkbox"/> | NC                       |
| E10 | Consideras que los pacientes que han sido covid+ tendran areas hospitalarias especificas                                                    | <input type="checkbox"/> | <input type="checkbox"/> | <input type="checkbox"/> | <input type="checkbox"/> | NC                       |
| E11 | Consideras que los servicios de neurologia tendrán neurologos con mayor dedicacion a enf infecciosas                                        | <input type="checkbox"/> | <input type="checkbox"/> | <input type="checkbox"/> | <input type="checkbox"/> | NC                       |
| E12 | Consideras que los servicios de neurologia deberán incorporar a sus vias clinicas, criterios dependiente si los pacientes han sido covid+   | <input type="checkbox"/> | <input type="checkbox"/> | <input type="checkbox"/> | <input type="checkbox"/> | NC                       |
| E13 | Consideras que los servicios de neurologia potenciarán su relacion directa con los sistemas de emergencias                                  | <input type="checkbox"/> | <input type="checkbox"/> | <input type="checkbox"/> | <input type="checkbox"/> | NC                       |
| E14 | Consideras que los servicios de neurologia estarán preparados a una oleada de enfermedades neurologicas tras la pandemia si se presentaran. | <input type="checkbox"/> | <input type="checkbox"/> | <input type="checkbox"/> | <input type="checkbox"/> | NC                       |

#### 6. Bloque sobre los nuevos recursos que debe disponer los servicios de neurologia.

|    | <i>Consenso 85% (mayor); Consenso 71% (menor); NC ausencia de consenso</i>                                                                                            |                          |                          |                          |                          |                          |
|----|-----------------------------------------------------------------------------------------------------------------------------------------------------------------------|--------------------------|--------------------------|--------------------------|--------------------------|--------------------------|
|    | Enunciado                                                                                                                                                             | C85%+                    | C85%-                    | C71%+                    | C71%-                    | NC                       |
| F1 | Consideras que la pandemia conllevará que los servicios de Neurologia dispondrán de recursos adicionales                                                              | <input type="checkbox"/> | <input type="checkbox"/> | <input type="checkbox"/> | <input type="checkbox"/> | NC                       |
| F2 | Consideras que la pandemia conllevará debido al consumo de recursos por la misma que los servicios de Neurologia dispondrá de una disminucion de recursos adicionales | <input type="checkbox"/> | <input type="checkbox"/> | <input type="checkbox"/> | <input type="checkbox"/> | NC                       |
| F3 | Consideras que se dispondrán de equipos instrumentales con pantalla para valorar el fondo de ojo                                                                      | <input type="checkbox"/> | <input type="checkbox"/> | <input type="checkbox"/> | <input type="checkbox"/> | NC                       |
| F4 | Consideras que se dispondrán de equipos de EMG que reduzcan el tiempo de exposicion                                                                                   | <input type="checkbox"/> | <input type="checkbox"/> | <input type="checkbox"/> | C71%-                    | <input type="checkbox"/> |

|     |                                                                                                                                |                          |                          |                          |                          |                          |
|-----|--------------------------------------------------------------------------------------------------------------------------------|--------------------------|--------------------------|--------------------------|--------------------------|--------------------------|
| F5  | Consideras que se dispondrán de equipos de ultrasonografía de vasos cerebrales que no precisen la movilización de la sonda     | <input type="checkbox"/> | <input type="checkbox"/> | <input type="checkbox"/> | C71%-                    | <input type="checkbox"/> |
| F6  | Consideras que se dispondrán de equipos de telemedicina mejores y de mejor acceso                                              | <input type="checkbox"/> | <input type="checkbox"/> | C71%+                    | <input type="checkbox"/> | <input type="checkbox"/> |
| F7  | Consideras que se dispondrán de mayor difusión de líneas telefónicas y de acceso a internet                                    | C85%+                    | <input type="checkbox"/> | <input type="checkbox"/> | <input type="checkbox"/> | <input type="checkbox"/> |
| F8  | Consideras que aumentarán los recursos en análisis de biomarcadores                                                            | <input type="checkbox"/> | <input type="checkbox"/> | <input type="checkbox"/> | <input type="checkbox"/> | NC                       |
| F9  | Consideras que se impulsará de forma importante los archivos electrónicos                                                      | <input type="checkbox"/> | <input type="checkbox"/> | <input type="checkbox"/> | <input type="checkbox"/> | NC                       |
| F10 | Consideras que se aumentará la ratio de enfermería en las salas de hospitalización de neurología                               | <input type="checkbox"/> | <input type="checkbox"/> | <input type="checkbox"/> | <input type="checkbox"/> | NC                       |
| F11 | Consideras que conllevará la contratación de menos especialistas de neurología en favor de contratación de otros especialistas | <input type="checkbox"/> | <input type="checkbox"/> | <input type="checkbox"/> | <input type="checkbox"/> | NC                       |
| F12 | Consideras que conllevará la contratación de más especialistas de neurología                                                   | <input type="checkbox"/> | <input type="checkbox"/> | <input type="checkbox"/> | C71%-                    | <input type="checkbox"/> |

7. Bloque sobre la enfermería neurológica y el papel de la enfermería de enlace con los pacientes..

| <i>Consenso 85% (mayor); Consenso 71% (menor); NC ausencia de consenso</i> |                                                                                                     |                          |                          |                          |                          |                          |
|----------------------------------------------------------------------------|-----------------------------------------------------------------------------------------------------|--------------------------|--------------------------|--------------------------|--------------------------|--------------------------|
|                                                                            | Enunciado                                                                                           | C85%+                    | C85%-                    | C71%+                    | C71%-                    | NC                       |
| G1                                                                         | Consideras que la pandemia conllevará cambios en la organización de la enfermería neurológica       | <input type="checkbox"/> | <input type="checkbox"/> | <input type="checkbox"/> | <input type="checkbox"/> | NC                       |
| G2                                                                         | Consideras que se potenciará la figura de enfermería de enlace con los pacientes                    | <input type="checkbox"/> | <input type="checkbox"/> | C71%+                    | <input type="checkbox"/> | <input type="checkbox"/> |
| G3                                                                         | Consideras que cambiará la relación entre facultativos y enfermería en las salas de hospitalización | <input type="checkbox"/> | <input type="checkbox"/> | <input type="checkbox"/> | <input type="checkbox"/> | NC                       |
| G4                                                                         | Consideras que cambiará la relación entre pacientes y enfermería en las salas de hospitalización    | <input type="checkbox"/> | <input type="checkbox"/> | <input type="checkbox"/> | <input type="checkbox"/> | NC                       |
| G5                                                                         | Consideras que cambiará la relación entre facultativos y enfermería en las consultas                | <input type="checkbox"/> | <input type="checkbox"/> | <input type="checkbox"/> | <input type="checkbox"/> | NC                       |
| G6                                                                         | Consideras que cambiará la relación entre pacientes y enfermería en las consultas                   | <input type="checkbox"/> | <input type="checkbox"/> | <input type="checkbox"/> | <input type="checkbox"/> | NC                       |
| G7                                                                         | Consideras que habrá protocolos de manejo de la documentación en papel en la hospitalización        | <input type="checkbox"/> | <input type="checkbox"/> | <input type="checkbox"/> | <input type="checkbox"/> | NC                       |
| G8                                                                         | Consideras que habrá protocolos de manejo de la documentación en papel en las consultas             | <input type="checkbox"/> | <input type="checkbox"/> | <input type="checkbox"/> | <input type="checkbox"/> | NC                       |

|     |                                                                                                                                                   |                          |                          |                          |                          |                          |
|-----|---------------------------------------------------------------------------------------------------------------------------------------------------|--------------------------|--------------------------|--------------------------|--------------------------|--------------------------|
|     |                                                                                                                                                   |                          |                          |                          |                          |                          |
| G9  | Consideras que la supervision de enfermeria debe monitorizar la actuacion de los servicios de limpieza en las salas de hospitalizacion            | <input type="checkbox"/> | <input type="checkbox"/> | C71%+                    | <input type="checkbox"/> | <input type="checkbox"/> |
| G10 | Consideras que la supervision de enfermeria debe monitorizar la actuacion de los servicios de limpieza en las consultas                           | <input type="checkbox"/> | <input type="checkbox"/> | <input type="checkbox"/> | <input type="checkbox"/> | NC                       |
| G11 | Consideras que jefes de servicio y supervision de enfermeria debe monitorizar la actuacion de los servicios de limpieza en los despachos clinicos | <input type="checkbox"/> | <input type="checkbox"/> | <input type="checkbox"/> | <input type="checkbox"/> | NC                       |
| G12 | Consideras que la relacion entre facultativos y enfermeria cambiará                                                                               | <input type="checkbox"/> | <input type="checkbox"/> | <input type="checkbox"/> | <input type="checkbox"/> | NC                       |

### 8. Bloque sobre la atencion al Ictus.

|     | <i>Consenso 85% (mayor); Consenso 71% (menor); NC ausencia de consenso</i>                                                                                         |                          |                          |                          |                          |                          |
|-----|--------------------------------------------------------------------------------------------------------------------------------------------------------------------|--------------------------|--------------------------|--------------------------|--------------------------|--------------------------|
|     | Enunciado                                                                                                                                                          | C85%+                    | C85%-                    | C71%+                    | C71%-                    | NC                       |
| H1  | Consideras que la atención al ictus cambiará debido a la pandemia                                                                                                  | <input type="checkbox"/> | <input type="checkbox"/> | <input type="checkbox"/> | <input type="checkbox"/> | NC                       |
| H2  | Consideras que los planes de ictus incorporarán como variable la determinacion de covid+ como un dato a recoger por las urgencias en la aplicación de codigo ictus | <input type="checkbox"/> | <input type="checkbox"/> | <input type="checkbox"/> | <input type="checkbox"/> | NC                       |
| H3  | Debido al riesgo de infeccion, consideras que los codigos ictus modificarán el criterio de edad                                                                    | C85%+                    | <input type="checkbox"/> | <input type="checkbox"/> | <input type="checkbox"/> | <input type="checkbox"/> |
| H4  | Consideras que las unidades de ictus tendrán salas covid+ y covid-                                                                                                 | <input type="checkbox"/> | <input type="checkbox"/> | <input type="checkbox"/> | <input type="checkbox"/> | NC                       |
| H5  | Consideras que si hubiera salas de ictus covid+ seguiran en el servicio de neurologia                                                                              | <input type="checkbox"/> | <input type="checkbox"/> | <input type="checkbox"/> | <input type="checkbox"/> | NC                       |
| H6  | Consideras que en los pacientes covid+ se modificará las vias clinicas de atencion diagnostica                                                                     | <input type="checkbox"/> | <input type="checkbox"/> | C71%+                    | <input type="checkbox"/> | <input type="checkbox"/> |
| H7  | Consideras que en los pacientes covid+ se modificará las vias clinicas de atencion terapeutica                                                                     | <input type="checkbox"/> | <input type="checkbox"/> | <input type="checkbox"/> | <input type="checkbox"/> | NC                       |
| H8  | Consideras que en los pacientes covid+ se modificará los criterios de neurointervencion                                                                            | <input type="checkbox"/> | <input type="checkbox"/> | <input type="checkbox"/> | <input type="checkbox"/> | NC                       |
| H9  | Consideras que la pandemia conllevará una menor utilizacion del codigo ictus por los pacientes                                                                     | <input type="checkbox"/> | <input type="checkbox"/> | <input type="checkbox"/> | <input type="checkbox"/> | NC                       |
| H10 | Consideras que el virus sobre llevará un aumento de incidencia de ictus a medio plazo                                                                              | <input type="checkbox"/> | <input type="checkbox"/> | <input type="checkbox"/> | <input type="checkbox"/> | NC                       |
| H11 | Consideras que la pandemia supondrá un incremento en la mortalidad del ictus.                                                                                      | <input type="checkbox"/> | <input type="checkbox"/> | C71%+                    | <input type="checkbox"/> | <input type="checkbox"/> |

|     |                                                                                 |                          |                          |                          |                          |    |
|-----|---------------------------------------------------------------------------------|--------------------------|--------------------------|--------------------------|--------------------------|----|
| H12 | Consideras que las unidades de ictus cambiarán su organización tras la pandemia | <input type="checkbox"/> | <input type="checkbox"/> | <input type="checkbox"/> | <input type="checkbox"/> | NC |
|-----|---------------------------------------------------------------------------------|--------------------------|--------------------------|--------------------------|--------------------------|----|

### 9. Bloque sobre cambios en la docencia de la neurología.

|     | <i>Consenso 85% (mayor); Consenso 71% (menor); NC ausencia de consenso</i>                                                                                                                                                                     |                          |                          |                          |                          |                          |
|-----|------------------------------------------------------------------------------------------------------------------------------------------------------------------------------------------------------------------------------------------------|--------------------------|--------------------------|--------------------------|--------------------------|--------------------------|
|     | Enunciado                                                                                                                                                                                                                                      | C85%+                    | C85%-                    | C71%+                    | C71%-                    | NC                       |
| I1  | Consideras que la pandemia modificará hábitos docentes en los servicios de neurología                                                                                                                                                          | <input type="checkbox"/> | <input type="checkbox"/> | C71%+                    | <input type="checkbox"/> | <input type="checkbox"/> |
| I2  | Consideras que la estructura de sesiones clínicas presenciales se modificará                                                                                                                                                                   | <input type="checkbox"/> | <input type="checkbox"/> | C71%+                    | <input type="checkbox"/> | <input type="checkbox"/> |
| I3  | Consideras que la estructura de cursos presenciales se modificará                                                                                                                                                                              | C85%+                    | <input type="checkbox"/> | <input type="checkbox"/> | <input type="checkbox"/> | <input type="checkbox"/> |
| I4  | Consideras que aumentarán las sesiones virtuales                                                                                                                                                                                               | C85%+                    | <input type="checkbox"/> | <input type="checkbox"/> | <input type="checkbox"/> | <input type="checkbox"/> |
| I5  | Consideras que aumentarán los cursos virtuales                                                                                                                                                                                                 | C85%+                    | <input type="checkbox"/> | <input type="checkbox"/> | <input type="checkbox"/> | <input type="checkbox"/> |
| I6  | Consideras que se reducirán las prácticas hospitalarias con pacientes de los estudiantes.                                                                                                                                                      | <input type="checkbox"/> | <input type="checkbox"/> | <input type="checkbox"/> | <input type="checkbox"/> | NC                       |
| I7  | Consideras que aumentarán los talleres electrónicos de los estudiantes                                                                                                                                                                         | <input type="checkbox"/> | <input type="checkbox"/> | C71%+                    | <input type="checkbox"/> | <input type="checkbox"/> |
| I8  | Consideras que cambiará el plan formativo de la especialidad como consecuencia de la pandemia                                                                                                                                                  | <input type="checkbox"/> | <input type="checkbox"/> | <input type="checkbox"/> | <input type="checkbox"/> | NC                       |
| I9  | Consideras que habiendo demostrado los especialistas de neurología y MIR de neurología que son capaces de actuar en salas de infecciosos, no tendrá sentido aumentar los tiempos de medicina en la formación.                                  | <input type="checkbox"/> | <input type="checkbox"/> | <input type="checkbox"/> | <input type="checkbox"/> | NC                       |
| I10 | Aunque el plan de neurología establece la rotación obligatoria en infecciosas y eso no se ha cumplido en algunas unidades docentes, la comisión nacional de neurología monitorizará el cumplimiento de esta rotación en los futuros residentes | <input type="checkbox"/> | <input type="checkbox"/> | <input type="checkbox"/> | <input type="checkbox"/> | NC                       |
| I11 | Consideras que los tutores de neurología asegurarán que los residentes en formación adquieran las habilidades precisas para su protección en la práctica clínica                                                                               | C85%+                    | <input type="checkbox"/> | <input type="checkbox"/> | <input type="checkbox"/> | <input type="checkbox"/> |
| I12 | Consideras que la pandemia modificará la actitud de los residentes con los pacientes.                                                                                                                                                          | <input type="checkbox"/> | <input type="checkbox"/> | <input type="checkbox"/> | <input type="checkbox"/> | NC                       |
| I13 | Consideras que los congresos de neurología cambiarán tras la pandemia                                                                                                                                                                          | <input type="checkbox"/> | <input type="checkbox"/> | C71%+                    | <input type="checkbox"/> | <input type="checkbox"/> |



10. Bloque cambios sobre la investigación neurológica.

|     | Consenso 85% (mayor); Consenso 71% (menor); NC ausencia de consenso                                                                                          |                          |                          |                          |                          |                          |
|-----|--------------------------------------------------------------------------------------------------------------------------------------------------------------|--------------------------|--------------------------|--------------------------|--------------------------|--------------------------|
|     | Enunciado                                                                                                                                                    | C85%+                    | C85%-                    | C71%+                    | C71%-                    | NC                       |
| J1  | Consideras que la pandemia modificará la investigacion en los ensayos clinicos                                                                               | <input type="checkbox"/> | <input type="checkbox"/> | <input type="checkbox"/> | <input type="checkbox"/> | NC                       |
| J2  | Consideras que disminuiran los ensayos clinicos en neurologia                                                                                                | <input type="checkbox"/> | <input type="checkbox"/> | <input type="checkbox"/> | <input type="checkbox"/> | NC                       |
| J3  | Consideras que se implantará un protocolo de actuacion de los monitores en cuanto al manejo de las historias                                                 | <input type="checkbox"/> | <input type="checkbox"/> | C71%+                    | <input type="checkbox"/> | <input type="checkbox"/> |
| J4  | Consideras que se implantará un protocolo de actuacion de los monitores en cuanto al acceso al hospital y a las sala donde se realiza la monitorizacion      | <input type="checkbox"/> | <input type="checkbox"/> | C71%+                    | <input type="checkbox"/> | <input type="checkbox"/> |
| J5  | Consideras que habrá un protocolo de actuacion sobre los contratados para ensayos clinicos                                                                   | <input type="checkbox"/> | <input type="checkbox"/> | <input type="checkbox"/> | <input type="checkbox"/> | NC                       |
| J6  | Consideras que se limitará el acceso de los contratados para ensayos clinicos a las areas asistenciales                                                      | <input type="checkbox"/> | <input type="checkbox"/> | <input type="checkbox"/> | <input type="checkbox"/> | NC                       |
| J7  | Consideras que los pacientes reclutados para ensayos clinicos tendran una consideracion especifica sobre su estado covid                                     | <input type="checkbox"/> | <input type="checkbox"/> | <input type="checkbox"/> | <input type="checkbox"/> | NC                       |
| J8  | Consideras que en los requisitos eticos de la investigacion debe ser anonima los antecedentes de contagio a covid                                            | <input type="checkbox"/> | C85%-                    | <input type="checkbox"/> | <input type="checkbox"/> | <input type="checkbox"/> |
| J9  | Consideras que los servicios de neurologia implantaran lineas de investigacion sobre la repercusion de Covid en el sistema nervioso                          | C85%+                    | <input type="checkbox"/> | <input type="checkbox"/> | <input type="checkbox"/> | <input type="checkbox"/> |
| J10 | Consideras que teniendo en cuenta el alto numero de pacientes contagiados, se establecerán bases de datos especificas de las alteraciones neurologicas       | C85%+                    | <input type="checkbox"/> | <input type="checkbox"/> | <input type="checkbox"/> | <input type="checkbox"/> |
| J11 | Consideras que la pandemia conllevará mayor numero de recursos a la investigacion en neurologia                                                              | <input type="checkbox"/> | C85%-                    | <input type="checkbox"/> | <input type="checkbox"/> | <input type="checkbox"/> |
| J12 | Consideras que Covid generará un mayor interes por la investigacion en los neurologos.                                                                       | <input type="checkbox"/> | <input type="checkbox"/> | <input type="checkbox"/> | <input type="checkbox"/> | NC                       |
| J13 | Consideras que ha sido correcta que Neurologia, como otra revistas cientificas, ha establecido un metodo de publicacion rapida a los articulos sobre Covid19 | C85%+                    | <input type="checkbox"/> | <input type="checkbox"/> | <input type="checkbox"/> | <input type="checkbox"/> |
